# Supplementary material for: Title: End-of-Life Sedation and Gendered Grief Pathways: A Longitudinal Qualitative Study of Spouses Bereaved by Cancer.
Source: Research Square preprint supplement (doi:10.21203/rs.3.rs-8581099/v1), 2026-01-21
Supplement: Supplementary file 2 [file d1ea6a4ec8b8f6f642d061ee.docx]

Table 3. Classes and excerpts from the women's interviews at T0, T1 and T2.

| **Women** | T0 |  | T1 |  | T2 |  |
| --- | --- | --- | --- | --- | --- | --- |
| Class 1 | **Couple and family history** | She said to me, “It's not fair, Mom. I didn't get to spend much time with my dad.” It's hard to hear things like that. (QC) | **Maternal role and vulnerability** | I told her that if I'm home alone with my children, I won't take anti-anxiety medication. And she has a 3-year-old child. (MN) | **Evaluation of palliative care** | In terms of palliative care, I was fine, everything was perfect. (QC) |
|  |  | She was very close to her father. He was her dad. We have a daughter and a son, and my son is very, very close to me. He sticks to me like glue. And she was glued to me. (DN) |  | It's harder when you're alone, actually. (DC) |  | The emergency room, resuscitation, and the intensive care unit were violent, he said. It's cowboys in the emergency room. It was very, very violent. The palliative care unit was gentle. (DN) |
| Class 2 | **Acute care and critical moments** | At 11 p.m., I called the nurses because he was having difficulty breathing. In fact, I had already mentioned it in the afternoon. (MC) | **What remains for the children** | But we have our little ritual when we go to see him at the cemetery: we each bring a rose, take five minutes alone, and then talk to him about whatever we want to say. (QC) | **Life reorganization and the question of future romantic relationships** | I feel ready to start my life over and meet someone new. That too is the same. I didn't think I would be able to do it. (ND) |
|  |  | They withdrew fluid from him, I remember that, but how much, I couldn't tell you. (DN) |  | We're going to share the goal of the game, which is to share and help other children, and he got angry at me. Yes, I don't want to, I want to keep everything, it's Daddy's.(MN) |  |  |
| Class 3 | **Illness progression and treatments** | With metastases in the peritoneum, resulting in peritoneal carcinomatosis, so they didn't do anything else; they just closed it up. (CT) | **Emotional distress and non-acceptance** | You have to accept it. I know that it's day-to-day anyway. (OS) |  |  |
|  |  | So we're following this protocol, which isn't too bad, without saying it's good, and so the doctor is suggesting we sign up for another cycle (MN). |  | It's so hard to leave each other. What would he have said to me anyway? He would have said, “I love you,” that's for sure. (DN) |  |  |
| Class 4 |  |  | **Unresolved questions around the final days** | There are so many questions, and it's not easy to let go of them all and let what needs to be done happen. (MN) |  |  |

Table 4. Classes and excerpts from the men's interviews at T0, T1 and T2.

| **Men** | T0 |  | T1 |  | T2 |  |
| --- | --- | --- | --- | --- | --- | --- |
| Class 1 | **Illness history and its repercussions** | She needed a few rounds of chemotherapy before she could have the operation, so the four rounds of chemotherapy she had had had worked well enough for her to be able to have the operation. (UH) | **Relationship with healthcare teams (past and present)** | They knew her very well, so I went back to see the oncologist, the nurses, and the entire healthcare team. It was important for me to talk to the oncologist as well. (UH) | **Projects, travel, and social network** | I have people who call me and say, “Hey, there's a project, do you want to do it with us?” and I say yes. (ND) |
|  |  | But it's impossible to measure, but I think I'll never experience that pain. I think it was hell for her. (QN) |  | The palliative care nurses there, I'd really like to go back and see them. I don't know how to thank them because I think they took good care of her. (KE) |  | I'm just hanging out, there's always stuff to do around the house, and then I'm leaving because it's my birthday. (KE) |
| Class 2 | **The last days** | She had been fighting for quite a while, and you see, it was 8 p.m., and she passed away at 10:30 p.m. (KE) | **Absence and the continuing presence of the deceased, bereavement** | I'm actually going through a difficult phase because it's taking a long time and I miss her. (QN) | **Memories and family rituals** | Those were the best years, the best year with my wife on vacation. (TT) |
|  |  | That weighs on me a little, but the nurses and physicians told me, “Don't have any regrets.” But I was there, I was there the whole time during the three days that I needed to be there. (UH) |  | His presence is always there, even if we don't necessarily talk about it. Even with friends on the phone, we mention her from time to time. (BH) |  | She is in the cemetery here on my family's grave, so she is in the village. (BH) |
| Class 3 | **Couple history and previous losses** | We were together for 48 years. Her name was Carole. We met when we were relatively young. We spent a relatively uneventful life together, on the whole. (BH) |  |  | **Palliative care and circumstances of death** | I've been wanting to go back for a while now, both to thank people again. (TT) |
|  |  | Her mother had a child whom they named after me and who sadly died after birth. (TT) |  |  |  | For me, sedation is still something important. I don't see why we would let someone suffer and suffer. (MA) |
